# Supplementary material for: 1H-NMR-Based Metabolic Profiling in Muscle and Liver Tissue of Juvenile Turbot (Scophthalmus maximus) Fed with Plant and Animal Protein Sources
Source: MDPI journal article supplement (doi:10.3390/metabo13050612), 2023-04-28
Supplement: s1 [file s1]

## Supplementary Materials

**Table S1:** Assigned compounds in the <sup>1</sup>H-NMR-spectrum muscle (M) and liver (L) tissue of juvenile turbot (*Scophthalmus maximus*) fed with the different diets (F).

| Class                             | Compound            | <sup>1</sup> H chemical shift (ppm) | Extract |
|-----------------------------------|---------------------|-------------------------------------|---------|
| Organic acids                     | Acetate             | 1.9                                 | F, M, L |
|                                   | Adenine             | 8.2                                 | M       |
|                                   | ADP                 | 8.5                                 | M       |
| Amino acids, dipeptides           | Alanine             | 1.5                                 | F, M, L |
|                                   | AMP                 | 8.6                                 | M       |
| Amino acids, dipeptides           | Anserine            | 6.8; 3.8                            | M       |
| Amino acids, dipeptides           | Arginine            |                                     | M       |
| Amino acids, dipeptides           | Aspartate           | 2.8                                 | M       |
|                                   | ATP                 | 8.2; 4.4                            | M, L    |
| Amines and N-containing compounds |                     | 3.9; 3.3                            |         |
|                                   | Betaine             |                                     | F, M, L |
| Amino acids, dipeptides           | Carnitine           | 3.2                                 | F, M, L |
| Amines and N-containing compounds |                     | 3.2                                 |         |
|                                   | Choline             |                                     | F, M, L |
| Amines and N-containing compounds |                     | 3.9; 3.0                            |         |
|                                   | Creatine            |                                     | F, M, L |
| Amines and N-containing compounds |                     | 3.9; 3.0                            |         |
|                                   | Creatine phosphate  |                                     | F, M, L |
| Amines and N-containing compounds |                     |                                     |         |
|                                   | Creatinine          |                                     | F, L    |
| Amines and N-containing compounds |                     |                                     |         |
|                                   | Dimethylamine       |                                     | F, L    |
|                                   | Dimethyl sulfone    |                                     | F, L    |
| Organic acids                     | Formate             | 8.4                                 | M, L    |
| Organic acids                     | Fumarate            | 6.5                                 | F, M, L |
| Sugars                            | Glucose-6-phosphate | 5.2                                 | F, M, L |
| Amino acids, dipeptides           | Glutamate           | 2.3                                 | F, M, L |
| Amino acids, dipeptides           | Glutamine           |                                     | F, M    |
| Amino acids, dipeptides           | Glycine             | 3.5                                 | F, M, L |
| Amino acids, dipeptides           | Isoleucine          |                                     | F, M, L |
| Organic acids                     | Lactate             | 4.1; 1.3                            | F, M, L |
| Amino acids, dipeptides           | Leucine             | 0.9                                 | F, M, L |
| Organic acids                     | Malonate            | 3.1                                 | F, M, L |
| Amino acids, dipeptides           | Methionine          | 2.1                                 | F, M, L |
| Amines and N-containing compounds |                     | 2.9                                 |         |
|                                   | N,N-Dimethylglycine |                                     | F, M, L |
| Amines and N-containing compounds |                     |                                     |         |
|                                   | O-Phosphocholine    |                                     | F, L    |
| Amino acids, dipeptides           | Ornithine           |                                     | F       |
| Amino acids, dipeptides           | Proline             | 2.0                                 | F, M    |
| Amino acids, dipeptides           | Sarcosine           | 3.6; 2.7                            | F, M, L |
| Amino acids, dipeptides           | Serine              |                                     | F       |
| Organic acids                     | Succinate           | 2.4                                 | F, M, L |

|                                   |                        |          |         |
|-----------------------------------|------------------------|----------|---------|
| Amines and N-containing compounds | Taurine                | 3.4; 3.2 | F, M, L |
| Amino acids, dipeptides           | Threonine              | 1.3      | F, M, L |
| Amines and N-containing compounds | Trimethylamine N-oxide | 3.3      | F, M    |
| Amino acids, dipeptides           | Valine                 | 1.0      | F, M, L |

**Table S2.** Performance parameters of the juvenile turbot (*Scophthalmus maximus*) fed with different diets for 16 weeks.

| Level of fishmeal replacement | CTRL*              | PLANT*             | PAP*               | MIX         | P-value |
|-------------------------------|--------------------|--------------------|--------------------|-------------|---------|
|                               | 0%                 | 20%                | 20%                | 40%         |         |
| Initial body weight (g)       | <u>20.2 ± 0.3</u>  | <u>20.4 ± 0.4</u>  | <u>20.1 ± 0.5</u>  | 20.3 ± 0.4  | 0.852   |
| Final body weight (g)         | <u>85.2 ± 9.7</u>  | <u>82.1 ± 9.5</u>  | <u>82.9 ± 6.1</u>  | 81.9 ± 7.3  | 0.914   |
| Specific Growth rate (SGR)    | <u>1.28 ± 0.09</u> | <u>1.24 ± 0.09</u> | <u>1.26 ± 0.06</u> | 1.25 ± 0.07 | 0.852   |
| Feed conversion ratio (FCR)   | <u>0.87 ± 0.03</u> | <u>0.90 ± 0.02</u> | <u>0.92 ± 0.03</u> | 0.90 ± 0.04 | 0.109   |

CTRL: commercial-like formulation, PLANT: plant protein, PAP: processed animal protein, MIX: mixture of processed animal and plant protein. \*Underlined data from the CTRL, PAP and PLANT groups were previously published in Hoerterer, et al. [7]; Values are shown as means ± SD (n = 5 tanks per diet), no significant differences were detected by One-way ANOVA (P > 0.05).

**Table S3.** Final body weight, organ indices and glycogen and glucose levels in wet tissue of muscle and liver of juvenile turbot (*Scophthalmus maximus*) fed with different diets for 16 weeks.

| Level of fishmeal replacement               | CTRL*               | PLANT*               | PAP*                 | MIX          | P-value |
|---------------------------------------------|---------------------|----------------------|----------------------|--------------|---------|
|                                             | 0%                  | 20%                  | 20%                  | 40%          |         |
| Final body weight (g)                       | 89.7 ± 27.2         | 91.5 ± 33.3          | 92.1 ± 28.8          | 87.9 ± 34.3  | 0.983   |
| Hepato-somatic index (HSI)                  | <u>1.8 ± 0.3a</u>   | <u>1.5 ± 0.3b</u>    | <u>1.5 ± 0.3b</u>    | 1.4 ± 0.2b   | 0.006   |
| Muscle glycogen (mg g <sup>-1</sup> )       | <u>1.7 ± 0.7</u>    | <u>2.1 ± 0.7</u>     | <u>1.8 ± 0.7</u>     | 1.6 ± 0.7    | 0.298   |
| Muscle glucose (mg g <sup>-1</sup> )        | 0.14 ± 0.05         | 0.12 ± 0.04          | 0.14 ± 0.04          | 0.12 ± 0.04  | 0.244   |
| Muscle glucose/glycogen                     | 0.12 ± 0.10         | 0.06 ± 0.03          | 0.09 ± 0.04          | 0.08 ± 0.04  | 0.114   |
| Liver glycogen (mg g <sup>-1</sup> )        | <u>63.7 ± 23.9a</u> | <u>46.4 ± 16.0ab</u> | <u>48.0 ± 17.2ab</u> | 41.6 ± 22.5b | 0.025   |
| Liver glucose (µg g <sup>-1</sup> )         | 2.9 ± 1.1           | 2.8 ± 0.6            | 2.6 ± 0.6            | 3.2 ± 1.1    | 0.284   |
| Liver glucose/glycogen (x10 <sup>-5</sup> ) | 5.7 ± 4.7b          | 6.5 ± 1.9b           | 6.0 ± 2.1b           | 11.1 ± 7.8a  | 0.009   |

CTRL: commercial-like formulation, PLANT: plant protein, PAP: processed animal protein MIX: mixture of processed animal and plant protein. \*Underlined data from the CTRL, PAP and PLANT groups were previously published in Hoerterer, et al. [7]; Values are shown as means ± SD (n = 15 fish per diet), different letters (a, b, c) indicate significant differences between treatment groups detected one-way ANOVA and by Holm-Sidak method (P < 0.050).

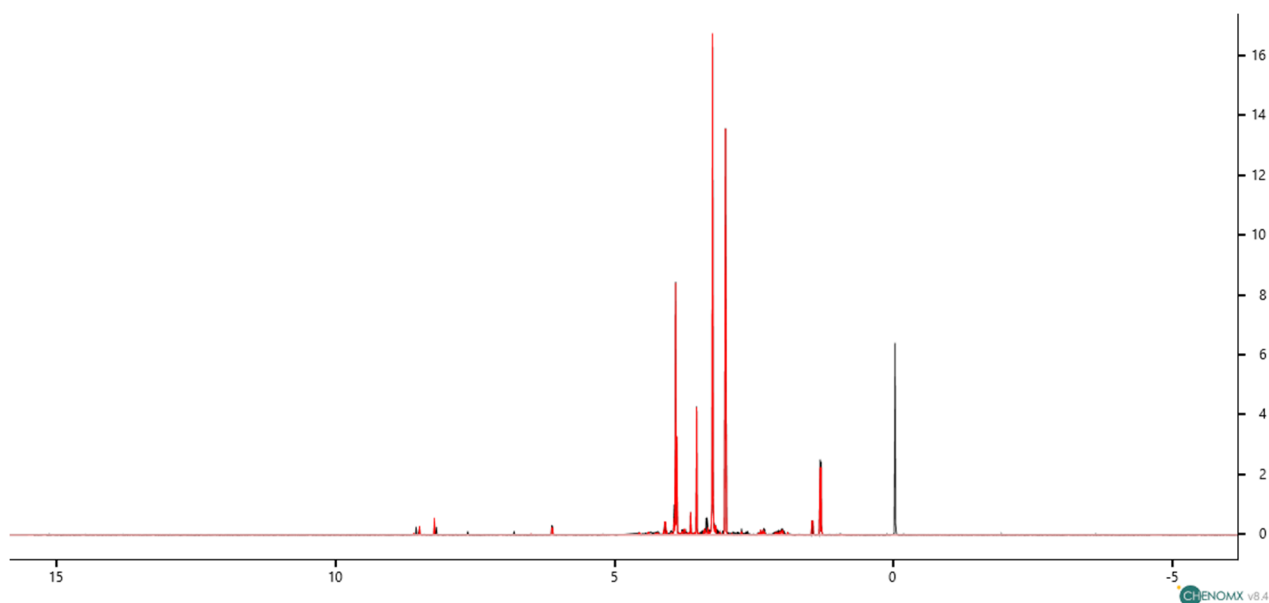

**Figure S1:** Representative <sup>1</sup>H-NMR spectrum of muscle tissue from turbot fed with the commercial-like CTRL diet. black: spectrum line, red: Sum line of compounds. Spectrum was generated using CHENOMX v8.4.

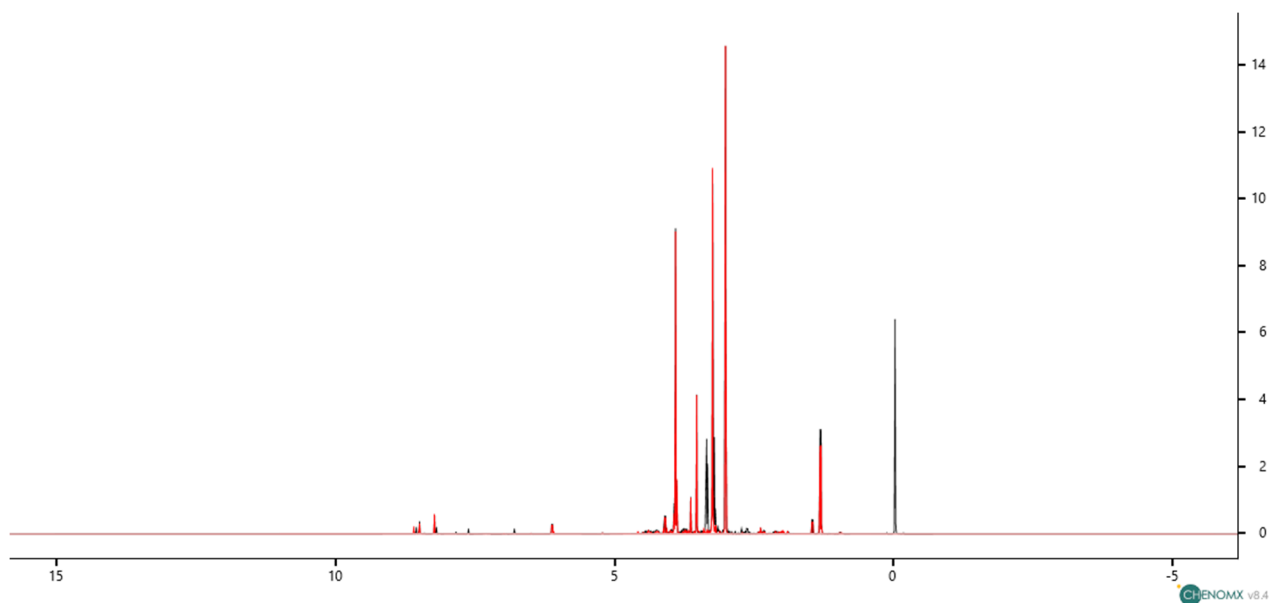

**Figure S2:** Representative <sup>1</sup>H-NMR spectrum of muscle tissue from turbot fed with the commercial-like PLANT diet. black: spectrum line, red: Sum line of compounds. Spectrum was generated using CHENOMX v8.4.

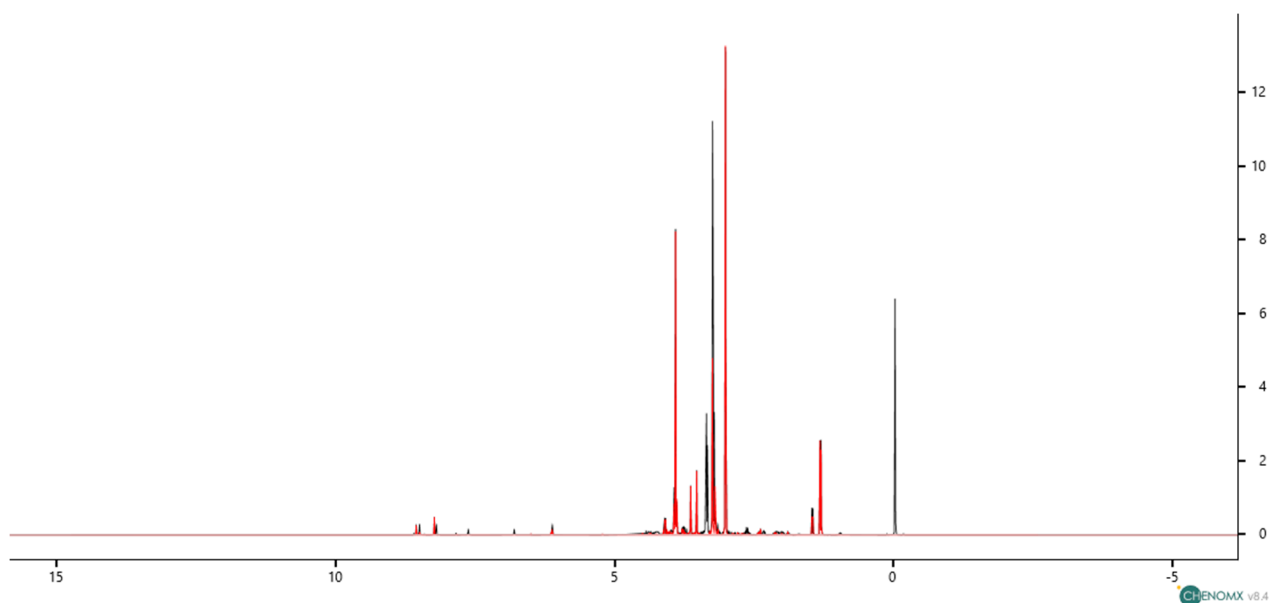

**Figure S3:** Representative <sup>1</sup>H-NMR spectrum of muscle tissue from turbot fed with the commercial-like PAP diet. black: spectrum line, red: Sum line of compounds. Spectrum was generated using CHENOMX v8.4.

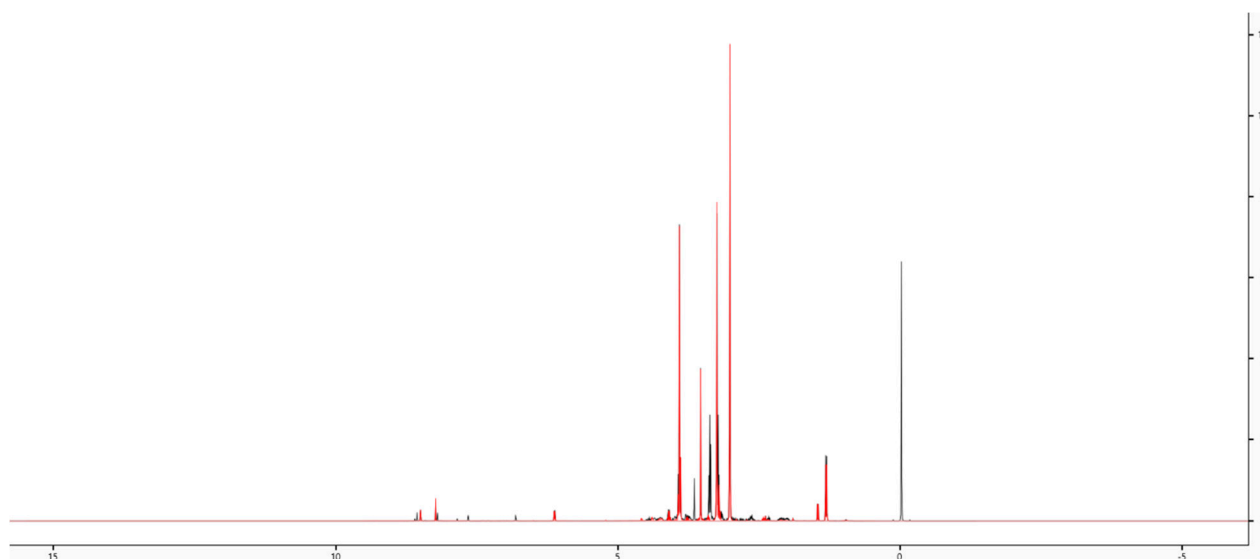

**Figure S4:** Representative <sup>1</sup>H-NMR spectrum of muscle tissue from turbot fed with the commercial-like MIX diet. black: spectrum line, red: Sum line of compounds. Spectrum was generated using CHENOMX v8.4.

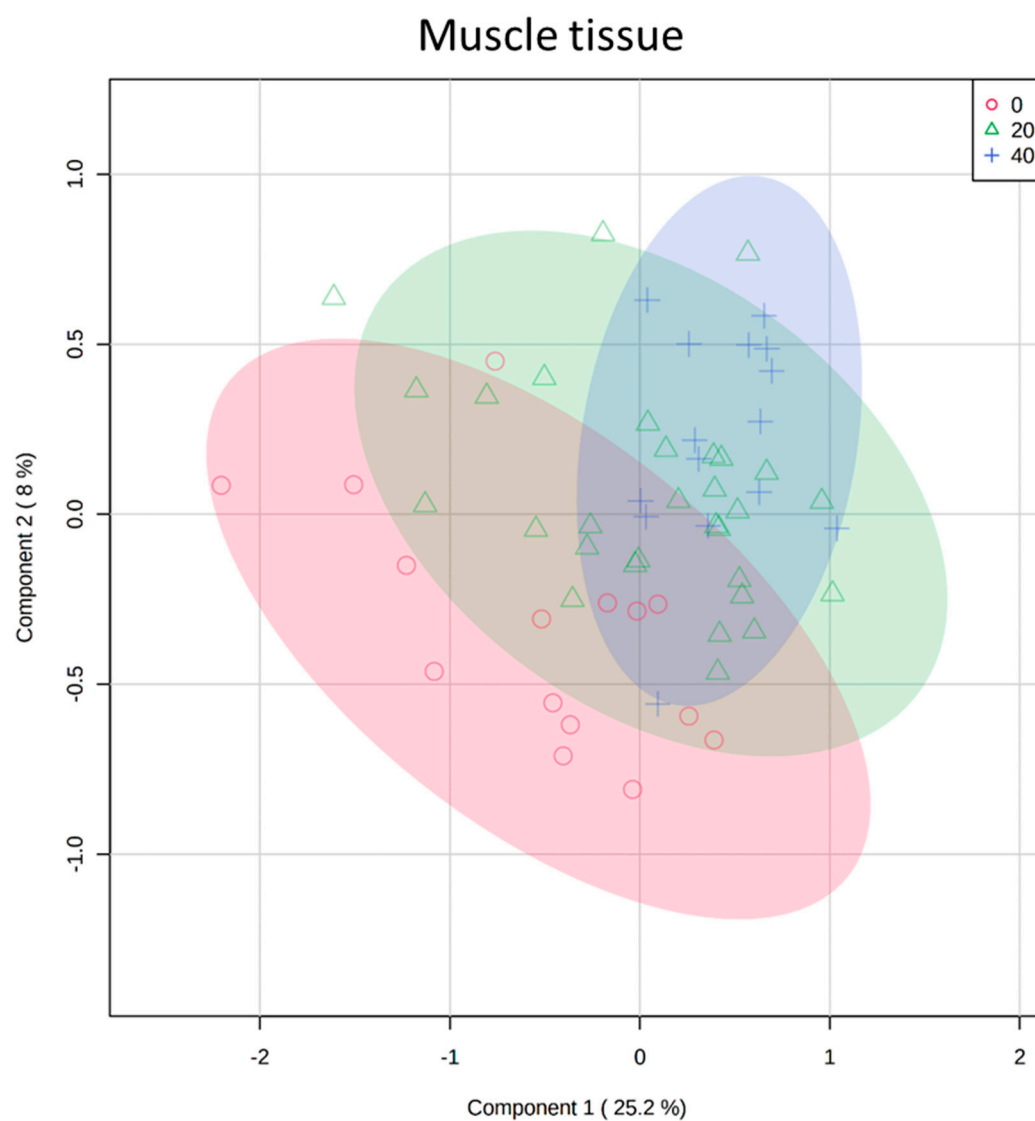

**Figure S5:** Score plot of the PLS-DA model for the concentrations of assigned metabolites from the aqueous tissue extracts of muscle of juvenile turbot (*Scophthalmus maximus*) fed with experimental diets with different fishmeal replacement levels (0%, 20% and 40%). Ellipses correspond to a confidence interval of 95% for each group.
