# Supplementary material for: 1H-NMR-Based Metabolic Profiling in Muscle and Liver Tissue of Juvenile Turbot (Scophthalmus maximus) Fed with Plant and Animal Protein Sources
Source: Metabolites. 2023 Apr 28;13(5):612. doi: 10.3390/metabo13050612 (PMC10221397; doi:10.3390/metabo13050612)
Supplement: Supplementary file 1 [file metabolites-13-00612-s001.zip › Tables.xlsx]

## Sheet: TableS1
Table S1: Assigned compounds in the 1H-NMR-spectrum muscle (M) and liver (L) tissue of juvenile turbot (Scophthalmus maximus) fed with the different diets (F).
Class	Compound	1H chemical shift (ppm)	Extract
Organic acids	Acetate	1.9	F, M, L
	Adenine	8.2	M
	ADP	8.5	M
Amino acids, dipeptides	Alanine	1.5	F, M, L
	AMP	8.6	M
Amino acids, dipeptides	Anserine	6.8; 3.8	M
Amino acids, dipeptides	Arginine		M
Amino acids, dipeptides	Aspartate	2.8	M
	ATP	8.2; 4.4	M, L
Amines and N-containing compounds	Betaine	3.9; 3.3	F, M, L
Amino acids, dipeptides	Carnitine	3.2	F, M, L
Amines and N-containing compounds	Choline	3.2	F, M, L
Amines and N-containing compounds	Creatine	3.9; 3.0	F, M, L
Amines and N-containing compounds	Creatine phosphate	3.9; 3.0	F, M, L
Amines and N-containing compounds	Creatinine		F, L
Amines and N-containing compounds	Dimethylamine		F, L
	Dimethyl sulfone		F, L
Organic acids	Formate	8.4	M, L
Organic acids	Fumarate	6.5	F, M, L
Sugars	Glucose-6-phosphate	5.2	F, M, L
Amino acids, dipeptides	Glutamate	2.3	F, M, L
Amino acids, dipeptides	Glutamine		F, M
Amino acids, dipeptides	Glycine	3.5	F, M, L
Amino acids, dipeptides	Isoleucine		F, M, L
Organic acids	Lactate	4.1; 1.3	F, M, L
Amino acids, dipeptides	Leucine	0.9	F, M, L
Organic acids	Malonate	3.1	F, M, L
Amino acids, dipeptides	Methionine	2.1	F, M, L
Amines and N-containing compounds	N,N-Dimethylglycine	2.9	F, M, L
Amines and N-containing compounds	O-Phosphocholine		F, L
Amino acids, dipeptides	Ornithine		F
Amino acids, dipeptides	Proline	2	F, M
Amino acids, dipeptides	Sarcosine	3.6; 2.7	F, M, L
Amino acids, dipeptides	Serine		F
Organic acids	Succinate	2.4	F, M, L
Amines and N-containing compounds	Taurine	3.4; 3.2	F, M, L
Amino acids, dipeptides	Threonine	1.3	F, M, L
Amines and N-containing compounds	Trimethylamine N-oxide	3.3	F, M
Amino acids, dipeptides	Valine	1	F, M, L

## Sheet: TableS2
Table S2. Performance parameters of the juvenile turbot (Scophthalmus maximus) fed with different diets for 16 weeks.
	CTRL*	PLANT*	PAP*	MIX	P-value
Level of fishmeal replacement	0	0.2	0.2	0.4
Initial body weight (g)	20.2 ± 0.3	20.4 ± 0.4	20.1 ± 0.5	20.3 ± 0.4	0.852
Final body weight (g)	85.2 ± 9.7	82.1 ± 9.5	82.9 ± 6.1	81.9 ± 7.3	0.914
Specific Growth rate (SGR)	1.28 ± 0.09	1.24 ± 0.09	1.26 ± 0.06	1.25 ± 0.07	0.852
Feed conversion ratio (FCR)	0.87 ± 0.03	0.90 ± 0.02	0.92 ± 0.03	0.90 ± 0.04	0.109
CTRL: commercial-like formulation, PLANT: plant protein, PAP: processed animal protein, MIX: mixture of processed animal and plant protein. *Underlined data from the CTRL, PAP and PLANT groups were previously published in Hoerterer, et al. [7]; Values are shown as means ± SD (n = 5 tanks per diet), no significant differences were detected by One-way ANOVA (P > 0.05).

## Sheet: TableS3
Table S3. Final body weight, organ indices and glycogen and glucose levels in wet tissue of muscle and liver of juvenile turbot (Scophthalmus maximus) fed with different diets for 16 weeks.
	CTRL*	PLANT*	PAP*	MIX	P-value
Level of fishmeal replacement	0	0.2	0.2	0.4
Final body weight (g)	89.7 ± 27.2	91.5 ± 33.3	92.1 ± 28.8	87.9 ± 34.3	0.983
Hepato-somatic index (HSI)	1.8 ± 0.3a	1.5 ± 0.3b	1.5 ± 0.3b	1.4 ± 0.2b	0.006
Muscle glycogen (mg g-1)	1.7 ± 0.7	2.1 ± 0.7	1.8 ± 0.7	1.6 ± 0.7	0.298
Muscle glucose (mg g-1)	0.14 ± 0.05	0.12 ± 0.04	0.14 ± 0.04	0.12 ± 0.04	0.244
Muscle glucose/glycogen	0.12 ± 0.10	0.06 ± 0.03	0.09 ± 0.04	0.08 ± 0.04	0.114
Liver glycogen (mg g-1)	63.7 ± 23.9a	46.4 ± 16.0ab	48.0 ± 17.2ab	41.6 ± 22.5b	0.025
Liver glucose (µg g-1)	2.9 ± 1.1	2.8 ± 0.6	2.6 ± 0.6	3.2 ± 1.1	0.284
Liver glucose/glycogen (x10-5)	5.7 ± 4.7b	6.5 ± 1.9b	6.0 ± 2.1b	11.1 ± 7.8a	0.009
CTRL: commercial-like formulation, PLANT: plant protein, PAP: processed animal protein MIX: mixture of processed animal and plant protein. *Underlined data from the CTRL, PAP and PLANT groups were previously published in Hoerterer, et al. [7]; Values are shown as means ± SD (n = 15 fish per diet), different letters (a, b, c) indicate significant differences between treatment groups detected one-w…
